# Supplementary material for: Atomic Force Microscopy Demonstrates that Candida glabrata Uses Three Epa Proteins To Mediate Adhesion to Abiotic Surfaces
Source: PubMed Central journal article supplement (PMC6495341; doi:10.1128/msphere.00277-19), 2019-05-01
Supplement: mSphere.00277-19-sf003.pdf [file mSphere.00277-19-sf003.pdf]

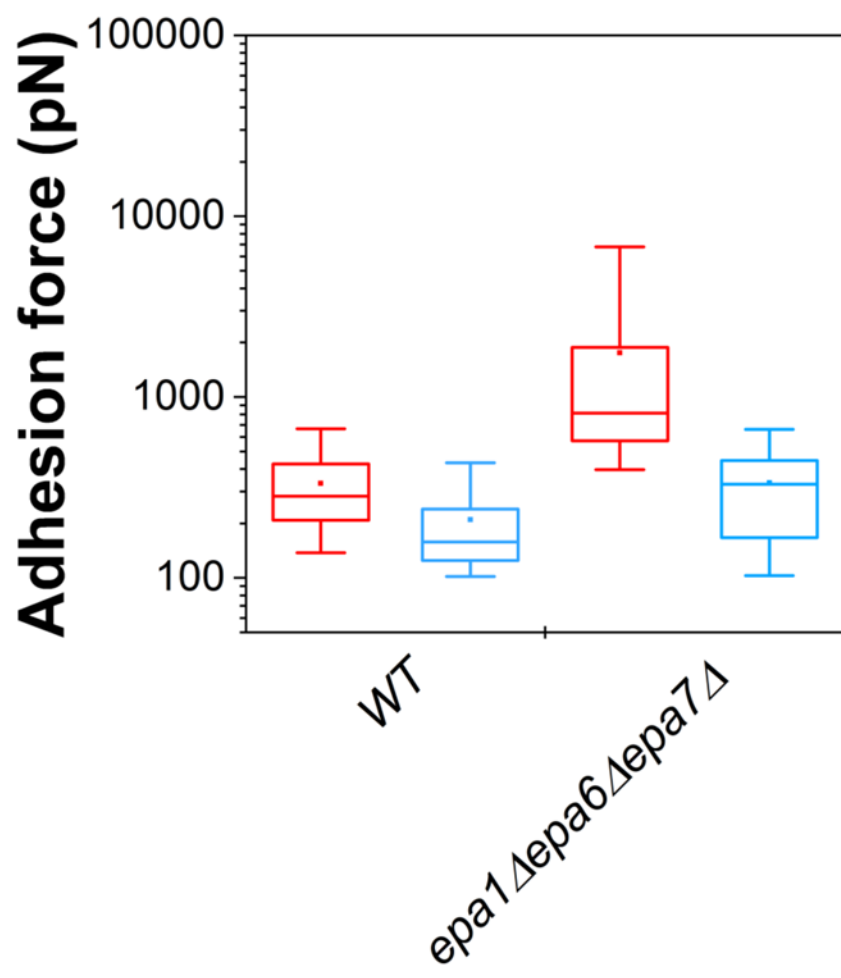

Figure S3
