# Supplementary material for: Atomic Force Microscopy Demonstrates that Candida glabrata Uses Three Epa Proteins To Mediate Adhesion to Abiotic Surfaces
Source: PubMed Central journal article supplement (PMC6495341; doi:10.1128/msphere.00277-19), 2019-05-01
Supplement: mSphere.00277-19-st001.pdf [file mSphere.00277-19-st001.pdf]

**Table S1. Fungal strains used in this study**

| Strain | Genotype                                                       |                                      |
|--------|----------------------------------------------------------------|--------------------------------------|
| BG2    | Clinical isolate                                               | Fidel <i>et al</i> , 1996 (1)        |
| BG14   | <i>ura3Δ::Tn903 G418<sup>R</sup></i>                           | Cormack <i>et al</i> , 1999 (2)      |
| BG676  | <i>ura3Δ::Tn903 G418<sup>R</sup> sir3Δ</i>                     | De Las Peñas <i>et al</i> , 2003 (3) |
| BG966  | <i>ura3Δ::Tn903 G418<sup>R</sup> sir3Δ (epa1, epa6, epa7)Δ</i> | Castaño <i>et al</i> , 2005 (4)      |
| BG995  | <i>ura3Δ::Tn903 G418<sup>R</sup> sir3Δ (epa6, epa7)Δ</i>       | Castaño <i>et al</i> , 2005 (4)      |
| BG1007 | <i>ura3Δ::Tn903 G418<sup>R</sup> sir3Δ (epa1, epa6)Δ</i>       | Castaño <i>et al</i> , 2005 (4)      |
| BG1012 | <i>ura3Δ::Tn903 G418<sup>R</sup> sir3Δ (epa1, epa7)Δ</i>       | Castaño <i>et al</i> , 2005 (4)      |
| BG1026 | <i>URA3 (epa1, epa6, epa7)Δ</i>                                | Castaño <i>et al</i> , 2005 (4)      |
| BG1028 | <i>URA3 (epa1, epa7)Δ</i>                                      | Castaño <i>et al</i> , 2005(4)       |
| BG1044 | <i>URA3 (epa1, epa6)Δ</i>                                      | Castaño <i>et al</i> , 2005 (4)      |
| BG1025 | <i>URA3 (epa6, epa7)Δ</i>                                      | Castaño <i>et al</i> , 2005 (4)      |

1. Fidel PL, Jr., Cutright JL, Tait L, Sobel JD. 1996. A murine model of *Candida glabrata* vaginitis. *J Infect Dis* 173:425-31.
2. Cormack BP, Falkow S. 1999. Efficient homologous and illegitimate recombination in the opportunistic yeast pathogen *Candida glabrata*. *Genetics* 151:979-87.
3. De Las Penas A, Pan SJ, Castano I, Alder J, Cregg R, Cormack BP. 2003. Virulence-related surface glycoproteins in the yeast pathogen *Candida glabrata* are encoded in subtelomeric clusters and subject to RAP1- and SIR-dependent transcriptional silencing. *Genes Dev* 17:2245-58.
4. Castano I, Pan SJ, Zupancic M, Hennequin C, Dujon B, Cormack BP. 2005. Telomere length control and transcriptional regulation of subtelomeric adhesins in *Candida glabrata*. *Mol Microbiol* 55:1246-58.
